# Supplementary material
Source: PubMed Central journal article supplement (PMC3996977)
Supplement: Supp_Table1.pdf [file Supp_Table1.pdf]

SUPPLEMENTARY TABLE S1. NONISOCALORIC RICE-BASED 5-DAY MEAL PLAN: BREAKFAST MENU

| Menu  | Main course                                        |                                                    |                                                    | Description                                                                                                                                                                                            | Accompaniments          |                                        |                                                |
|-------|----------------------------------------------------|----------------------------------------------------|----------------------------------------------------|--------------------------------------------------------------------------------------------------------------------------------------------------------------------------------------------------------|-------------------------|----------------------------------------|------------------------------------------------|
|       | WR                                                 | BR                                                 | BRL                                                |                                                                                                                                                                                                        | BR, WR, and BRL         | BR and WR                              | BRL                                            |
| Day 1 | <i>Idly</i> (WR with black gram split legumes)     | <i>Idly</i> (BR with black gram split legumes)     | <i>Idly</i> (BR with whole black gram legume)      | Steamed pancake made from fermented rice and black gram whole/split legume batter (3:1, rice-to-legume ratio)                                                                                          | Onion chutney (dip)     | Tomato gravy                           | Tomato gravy                                   |
| Day 2 | <i>Rava uppma</i> (WR)                             | <i>Rava uppma</i> (BR)                             | <i>Rava uppma</i> (BR) <sup>a</sup>                | Rice grits stir-fried with mustard, Bengal gram <i>dhal</i> , pepper, and cumin seeds and boiled in water                                                                                              | Tomato chutney (dip)    | <i>Brinjal</i> (green gram dhal gravy) | <i>Brinjal</i> (green gram whole legume gravy) |
| Day 3 | <i>Oothappam</i> (WR with black gram split legume) | <i>Oothappam</i> (BR with black gram split legume) | <i>Oothappam</i> (BR with whole black gram legume) | Shallow fried pancake made from fermented rice and with whole/split legume batter (5:1, rice-to-lentil/legume ratio)                                                                                   | Mint chutney (dip)      | Vegetable gravy                        | Vegetable gravy                                |
| Day 4 | <i>Veg kitchidi</i> (WR)                           | <i>Veg kitchidi</i> (BR)                           | <i>Veg kitchidi</i> (BR) <sup>a</sup>              | Vegetables stir-fried with onion, ginger, garlic paste, and rice grits and boiled in water                                                                                                             | Coconut chutney (dip)   | Onion sambar                           | Chickpea (brown) gravy                         |
| Day 5 | <i>Pongal</i> (WR with green gram split legume)    | <i>Pongal</i> (BR with green gram split legume)    | <i>Pongal</i> (BR with whole green gram legume)    | Rice pressure-cooked with green gram split/whole legume (4:1, rice-to-legume ratio) and seasoned with <i>ghee</i> (clarified butter), pepper, cumin seeds, grated ginger, asafoetida, and curry leaves | Coriander chutney (dip) | Ladies finger gravy                    | Ladies finger gravy                            |

<sup>a</sup>The whole legume component for the brown rice with added legumes (BRL) diet was served in the accompaniments. BR, brown rice; WR, white rice.
