# Supplementary material
Source: PubMed Central journal article supplement (PMC3996977)
Supplement: Supp_Table2.pdf [file Supp_Table2.pdf]

SUPPLEMENTARY TABLE S2. LUNCH MENU

| Menu  | Main course                                                                     |                                                                                 |                                                                                               | Accompaniments                                                                                                                                                                                                                                        |
|-------|---------------------------------------------------------------------------------|---------------------------------------------------------------------------------|-----------------------------------------------------------------------------------------------|-------------------------------------------------------------------------------------------------------------------------------------------------------------------------------------------------------------------------------------------------------|
|       | WR                                                                              | BR                                                                              | BRL                                                                                           |                                                                                                                                                                                                                                                       |
| Day 1 | Plain cooked WR                                                                 | Plain cooked BR                                                                 | Plain cooked BR served with whole chickpea (white) and fried cabbage <sup>a</sup>             | Pressure-cooked WR in the rice:water ratio 1:2.5 Pressure-cooked BR in the rice:water ratio 1:2                                                                                                                                                       |
| Day 2 | WR vegetable <i>pulao</i> and curd rice served with fried split red gram legume | BR vegetable <i>pulao</i> and curd rice served with fried split red gram legume | BR vegetable <i>pulao</i> and curd rice served with whole chickpea (brown) gravy <sup>a</sup> | <i>Pulao</i> , vegetables sauted with spices, onion, ginger, garlic, and green chilli paste and stir-fried with rice. Curd rice, pressure-cooked rice mixed with curd (yogurt) and milk and seasoned with grated ginger, asafoetida, and curry leaves |
| Day 3 | Plain cooked WR served with ash gourd and split chickpea                        | Plain cooked BR served with ash gourd and split chickpea                        | Plain cooked BR served with ash gourd and whole chickpea (white) curry <sup>a</sup>           | Yogurt, <i>rasam</i> (tamarind soup), fried potato, <i>papadam</i> (thin crisp cracker), and pickle                                                                                                                                                   |
| Day 4 | White <i>sambar</i> rice made with split red gram lentil and curd rice          | Brown <i>sambar</i> rice made with split red gram lentil and curd rice          | Brown <i>sambar</i> rice made from whole chickpea (white) and curd rice <sup>a</sup>          | Yogurt with cucumber, <i>papadam</i> (thin crisp cracker), and pickle                                                                                                                                                                                 |
| Day 5 | Plain cooked WR served with greens and split green gram legume                  | Plain cooked BR served with greens and split green gram lentil                  | Plain cooked BR served with greens and whole green gram legume <sup>a</sup>                   | Yogurt, <i>rasam</i> (tamarind soup), carrot salad, <i>papadam</i> (thin crisp cracker), and pickle                                                                                                                                                   |

<sup>a</sup>The whole legume component for brown rice with added legumes (BRL) diet was served in the accompaniments. BR, brown rice; WR, white rice.
