# Supplementary material
Source: PubMed Central journal article supplement (PMC3996977)
Supplement: Supp_Table3.pdf [file Supp_Table3.pdf]

SUPPLEMENTARY TABLE S3. NUTRIENT COMPOSITION OF TEST FOODS (PER 100 G COOKED)

| Food item                                  | BR            |                  |             |         |                         | WR            |                  |             |         |                         | BRL           |                  |             |         |                         |
|--------------------------------------------|---------------|------------------|-------------|---------|-------------------------|---------------|------------------|-------------|---------|-------------------------|---------------|------------------|-------------|---------|-------------------------|
|                                            | Energy (kcal) | Carbohydrate (g) | Protein (g) | Fat (g) | Total dietary fiber (g) | Energy (kcal) | Carbohydrate (g) | Protein (g) | Fat (g) | Total dietary fiber (g) | Energy (kcal) | Carbohydrate (g) | Protein (g) | Fat (g) | Total dietary fiber (g) |
| Breakfast                                  |               |                  |             |         |                         |               |                  |             |         |                         |               |                  |             |         |                         |
| <i>Idly</i>                                | 134           | 25.6             | 5.7         | 0.9     | 3.5                     | 152           | 31.4             | 6.0         | 0.3     | 1.6                     | 122           | 23.4             | 5.2         | 0.8     | 4                       |
| <i>Pongal</i>                              | 105           | 17.6             | 3.9         | 2.1     | 2.7                     | 106           | 19.3             | 3.6         | 1.7     | 1.2                     | 104           | 17.4             | 3.8         | 1.9     | 3                       |
| <i>Rice kitchidi</i>                       | 135           | 22.5             | 4.0         | 3.2     | 3.0                     | 151           | 26.8             | 3.9         | 3.1     | 0.9                     | 135           | 22.5             | 4.0         | 3.2     | 3.0                     |
| <i>Rice rava uppma</i>                     | 135           | 21.7             | 4.0         | 3.6     | 2.9                     | 144           | 25.4             | 3.8         | 3.0     | 0.9                     | 135           | 21.7             | 4.0         | 3.6     | 2.9                     |
| <i>Oothappam</i>                           | 189           | 27.5             | 5.7         | 6.2     | 3.7                     | 244           | 41.5             | 7.2         | 5.5     | 1.8                     | 185           | 27.3             | 5.7         | 5.9     | 4.3                     |
| <i>Brinjal green gram whole</i>            | —             | —                | —           | —       | —                       | —             | —                | —           | —       | —                       | 52            | 6.8              | 2.3         | 1.7     | 2.8                     |
| <i>Chickpea (brown) gravy</i>              | —             | —                | —           | —       | —                       | —             | —                | —           | —       | —                       | 92            | 9.9              | 2.6         | 4.4     | 5                       |
| Lunch                                      |               |                  |             |         |                         |               |                  |             |         |                         |               |                  |             |         |                         |
| Plain rice                                 | 114           | 22.7             | 3.9         | 0.9     | 2.6                     | 99            | 21.7             | 2.9         | 0.1     | 0.2                     | 114           | 22.7             | 3.9         | 0.9     | 2.6                     |
| Vegetable <i>pulao</i>                     | 127           | 20.6             | 3.7         | 3.4     | 3.1                     | 105           | 18.5             | 2.8         | 2.3     | 1.1                     | 127           | 20.6             | 3.7         | 3.4     | 3.1                     |
| <i>Sambar</i> rice                         | 95            | 16.2             | 3.4         | 1.8     | 2.9                     | 89            | 16.4             | 3.0         | 1.3     | 1.5                     | 93            | 15.9             | 3.1         | 2       | 3.2                     |
| Curd rice                                  | 105           | 14.2             | 3.6         | 3.8     | 1.6                     | 92            | 13.7             | 2.9         | 2.9     | 0.2                     | 105           | 14.2             | 3.6         | 3.8     | 1.6                     |
| Chickpea (white) <i>sundal</i>             | —             | —                | —           | —       | —                       | —             | —                | —           | —       | —                       | 182           | 26.8             | 7.7         | 5.1     | 12.5                    |
| Ash gourd and whole chickpea (white) curry | —             | —                | —           | —       | —                       | —             | —                | —           | —       | —                       | 75            | 7.9              | 2.1         | 3.8     | 3.3                     |
| Chickpea (brown) gravy                     | —             | —                | —           | —       | —                       | —             | —                | —           | —       | —                       | 92            | 9.9              | 2.6         | 4.4     | 5                       |
| Greens and whole green gram gravy          | —             | —                | —           | —       | —                       | —             | —                | —           | —       | —                       | 55            | 8.0              | 3.3         | 1.1     | 2.8                     |

BR, brown rice; BRL brown rice with added legumes; WR, white rice.
